# Supplementary material for: Numerical Modeling of Sub-Wavelength Anti-Reflective Structures for Solar Module Applications
Source: MDPI journal article supplement (doi:10.3390/nano4010087), 2014-01-29
Supplement: s1 [file s1]

# Supplementary Information

**Table S1.** Semi-analytical effective medium approximations for 1-D and 2-D periodic structures[14].

| Grating Dimension | Polarization | Order | Formula                                                                                                                                                                                                                                                                                          |
|-------------------|--------------|-------|--------------------------------------------------------------------------------------------------------------------------------------------------------------------------------------------------------------------------------------------------------------------------------------------------|
| 1-D               | TE           | 2nd   | $\eta = \varepsilon_0 + \alpha^{-2} \sum_{p \neq 0} \frac{\varepsilon_{-p} \varepsilon_p}{p^2} + O(\alpha^{-4}).$                                                                                                                                                                                |
| 1-D               | TM           | 2nd   | $\eta = \frac{1}{a_0} + \alpha^{-2} \frac{1}{a_0^3} \sum_{p \neq 0} \frac{a_{-p} b_{p0}}{p} + O(\alpha^{-4}).$                                                                                                                                                                                   |
| 2-D               | Unpolarized  | 0th   | $\eta_0 = \varepsilon_{0,0} - \sum_{p,q \neq 0} \sum_{m \geq 0, n > 0} \varepsilon_{m,n} a_{m,n}^{p,q} \varepsilon_{p,q} n.$                                                                                                                                                                     |
| 2-D               | Unpolarized  | 2nd   | $\eta_2 = \sum_{p,q \neq 0} \sum_{m \geq 0, n > 0} \varepsilon_{p,q} a_{m,n}^{p,q} c_{mn} + \sum_{p \neq 0} \frac{\varepsilon_{p,0}}{p^2 \rho^2} \left( \varepsilon_{p,0} - \sum_{\substack{(r,t) \neq (0,0) \\ u \geq 0, v > 0}} \varepsilon_{p-r,t} a_{r,t}^{u,v} \varepsilon_{r,t} t \right)$ |

**Table S2.** Literature summary of finite-difference time-domain modeling results for maximum anti-reflective properties.

| Authors, Year                            | Structure Shapes                          | Nanostructure Material | Lattice Size (nm) | Structure Widths (nm) | Structure Heights (nm) | $\Lambda$ (nm)                | Results                                                                                                                                                                                                                                |
|------------------------------------------|-------------------------------------------|------------------------|-------------------|-----------------------|------------------------|-------------------------------|----------------------------------------------------------------------------------------------------------------------------------------------------------------------------------------------------------------------------------------|
| Deinega, Valuev, Potapkin, Lozovik, 2011 | Triangular-based pyramids, closest packed | $n = 1.5$              | $\Lambda$         | $\Lambda/3^{0.5}$     | 0 to $5\Lambda$        | $\Lambda/\lambda = 0.1$ to 10 | Minimal reflectance occurs when the GRIN structures have diameters on the order of the wavelength and the height is large in comparison to the wavelength. For our solar spectrum a diameter around 500 nm is sufficient for $R < 1\%$ |
|                                          | Square-based pyramids, closest packed     | $n = 1.5$              | $\Lambda$         | $\Lambda$             | 0 to $5\Lambda$        | $\Lambda/\lambda = 0.1$ to 10 |                                                                                                                                                                                                                                        |
|                                          | Hexagonal-based pyramids, closest packed  | $n = 1.5$              | $\Lambda$         | $\Lambda$             | 0 to $5\Lambda$        | $\Lambda/\lambda = 0.1$ to 10 |                                                                                                                                                                                                                                        |
|                                          | Cones, closest packed                     | $n = 1.5$              | $\Lambda$         | $\Lambda$             | 0 to $5\Lambda$        | $\Lambda/\lambda = 0.1$ to 10 |                                                                                                                                                                                                                                        |

Table S2. Cont.

|                                                |                                                                       |                                      |         |                              |                                                       |                       |                                                                                                                                                                                                                                                                                                                    |
|------------------------------------------------|-----------------------------------------------------------------------|--------------------------------------|---------|------------------------------|-------------------------------------------------------|-----------------------|--------------------------------------------------------------------------------------------------------------------------------------------------------------------------------------------------------------------------------------------------------------------------------------------------------------------|
| Deniz, Khudiyev, Buyukserin, Bayindir, 2011    | Hexaganol nanorods, tapered nanorods, thin films with nanorods on top | Hydrogen silsesquioxane              | 130 nm  | 80 nm                        | 0–400                                                 | 400–800 nm            | Optimum nanorod height was 175 nm, Measured transmission lower than simulated though similar behavior with wavelength                                                                                                                                                                                              |
| Park, Shin, Kang, Baek, Kim, Padilla, 2011     | Si substrate and cones with PS nanoislands on top                     | Polystyrene nanoislands and Si cones | 500 nm  | Cone 300 nm top, 500 nm base | Nanoislands 0, 50, 100 nm thick on top of 500 nm cone | Broadband, 300–900 nm | 50 nm thick nanoislands of PS decreased reflectance most                                                                                                                                                                                                                                                           |
| Son, Verma, Danner, Bhatia, Yang, 2011         | V-shaped nanoholes                                                    | $n = 1.5$                            | 100 nm  | 60 nm                        | 300 nm                                                | 400–1200 nm           | Nanostructure increases transmission at least 3% at all angles of incidence up to $70^\circ$                                                                                                                                                                                                                       |
| Yi, Lee, Park, 2011                            | Conical ( $5^\circ$ angle) and cylindrical nanowires                  | Si                                   | 1500 nm | 200 and 1000 for cylinders   | 1500 nm                                               | 300–800 nm            | Reflectivity from substrate and nanocone array were 47% and 2.4%, cylinders were 22% $R$ for 200 nm wide and 29% $R$ for 1000 nm wide.                                                                                                                                                                             |
| Chuang, Chen, Shieh, Lin, Cheng, Liu, Yu, 2010 | Cones                                                                 | Si                                   | 350     | 245                          | 400                                                   | 1250 nm               | Unique inverse polarization at Brewster angle on moth eye structures arises from TM polarized light having a higher reflectance than TE (unlike on flat surfaces). Distorted transmission plane wavefront randomizes the oscillating direction of electric dipoles in textured Si, eliminating the Brewster effect |

Table S2. Cont.

|                                                                   |                                                          |            |                                                |           |                            |                                   |                                                                                                                                                                                                                                             |
|-------------------------------------------------------------------|----------------------------------------------------------|------------|------------------------------------------------|-----------|----------------------------|-----------------------------------|---------------------------------------------------------------------------------------------------------------------------------------------------------------------------------------------------------------------------------------------|
| Deinega, Valuev, Potapkin, Lozovik, 2010                          | Pyramids with square bases and Cones, all closest packed | $n = 1.5$  | $\Lambda$                                      | $\Lambda$ | $0.1\Lambda$ to $5\Lambda$ | 20 to 0.1 features per wavelength | Larger feature sizes better at fixed width to height ratios, though widths above the wavelength size rely on higher order diffractions for increased transmission.                                                                          |
| Ting, Chen, Hsu, 2010                                             | Cones                                                    | $n = 1.54$ | 300,600                                        | 300,600   | 300,600                    | 400–1400 nm                       | For same size structures antireflective properties decrease with discontinuous arrangements (incomplete SWS coverage), aspect ratio of 2 better than 1, reflectances as low as 0.46%                                                        |
| Ting, Chen, Hsu, 2010                                             | pyramids                                                 |            | 300,600                                        | 300,600   | 300,600                    | 400–1400 nm                       |                                                                                                                                                                                                                                             |
| Ting, Chen, Hsu, 2010                                             | Composite pyramid and rounded cone                       |            | 300,600                                        | 300,600   | 300,600                    | 400–1400 nm                       |                                                                                                                                                                                                                                             |
| Chou, Cheng, Chang, Ting, Hsu, Wu, Tsai, Huang, 2009              | Conical ARSWS in cholesteric liquid crystal              | $n = 1.54$ | 300 nm                                         | 150 nm    | 75–300                     | 250–800 nm                        | Aspect ratio bigger than 0.8 reflectance is under 1%                                                                                                                                                                                        |
| Deinega, Konistyapina, Bogdanova, Valuev, Lozovik, Potapkin, 2009 | Cones                                                    | Si         | Fill factors: 40 to 600 0.91 0.8, 0.5, and 0.2 |           | 350–520                    | 400–800 nm                        | As cone height increases reflectivity decreases. FDTD shows this trend continues for sizes outside applicability of EMT. Lowest reflectivity had densest packed cones, length of 500 nm, $r = 100$ nm                                       |
| Ting, Chen, Chou, 2009                                            | Pyramids                                                 | $n = 1.54$ | 300                                            | 300       | 150–600                    | 400–800 nm                        | Conical and pyramidal shapes over broadband range for low $R$ . Pyramids better than cones when AR is up to 0.8. Cones transmittance increases gradually with AR average is 99.6% with AR = 2, pyramids AR from 1 to 2 transmittance 99.7%. |

Table S2. Cont.

|                                    |                                            |                                            |            |            |                                               |              |                                                                                                                                                                                                                                                                   |
|------------------------------------|--------------------------------------------|--------------------------------------------|------------|------------|-----------------------------------------------|--------------|-------------------------------------------------------------------------------------------------------------------------------------------------------------------------------------------------------------------------------------------------------------------|
|                                    | Rounded Cones                              |                                            | 300        | 300        | 150–600                                       | 400–800 nm   |                                                                                                                                                                                                                                                                   |
| Tsai, 2008                         | Pyramidal                                  | $n = 1.54$                                 | 150–600    | 150–600    | 150–600                                       | 250–800      | Semi-spherical polymer film ARC produced in lab and shows similar reflectivity to FDTD calculations, pyramidal structure has best performance in FDTD, nearly 1/10 to 1/100 the $R$ as semi spherical and discontinuous semi-spherical, respectively              |
|                                    | semi-spherical                             |                                            | 150–600    | 150–600    | 150–600                                       | 250–800      |                                                                                                                                                                                                                                                                   |
|                                    | Discontinuous semi-spherical               |                                            | 300–600    | 150–300    | 150–600                                       | 250–800      |                                                                                                                                                                                                                                                                   |
| Chen, Chuang, Lin, Lin, 2007       | Pyramid                                    | Si                                         | 350        | 350        | 200, 500                                      | 366          | Increasing pyramid height from 200 to 500 nm reduced reflections significantly, FDTD confirms RCWA results                                                                                                                                                        |
| Yang Zhu Zhao Cao, 2004            | Glass covered with polymer nanoporous film | Polymer $n = 1.46$                         | Unknown    | N/A        | 5%, 10%, 15%, 20%, 30% pore ratio films       | 400–800 nm   | transmission 99.5% between 400 and 800 nm of the 30% porous film, simulated one wavelength at a time                                                                                                                                                              |
| Feng, Zhou, Huang, 2003            | Multiple layer thin films                  | $n = 2.415$ and $n = 1.444$                | N/A        | N/A        | Layers 1 through 4: 135, 464, 251, and 223 nm | 1450–1650 nm | Mapping established between parameter spaces of fine (FDTD) and coarse (TMM) models, focus on iterative parameter extraction and performance convergence, demonstrated by a 180 nm bandwidth four-layer ARC with $R < 10^{-4}$ using only three FDTD calculations |
| Ichikawa, 2002                     | Regular and random triangular gratings     | silica                                     | 240–360 nm | 240–360 nm | 550 nm                                        | 400–800 nm   | Randomizing has little effect on reflection, but relieves partially relieves subwavelength requirements and some fabrication constraints                                                                                                                          |
| Yamauchi, Mita, Aoki, Nakano, 1996 | Double layer thin film AR coatings         | $n_1 = 2.76$ , $n_2 = 1.46$ on $n = 3.564$ | N/A        | N/A        | Film thicknesses of 138 nm and 266 nm         | 1500–1600    | Berenger's PML ABC is better than the Mur-ABC, which was used by this group in 1993                                                                                                                                                                               |

**Table S3.** Correlation of modeling and experimental results for finite-difference time-domain modeling.

| Authors                               | Paper title                                                                                                            | Nanostructure Material  | Year | Structure Shape                                                       | Lattice Size (nm) | Structure Width (nm) | Structure Height (nm) | Wavelengths (nm) | Results                                                                                                                                                 |
|---------------------------------------|------------------------------------------------------------------------------------------------------------------------|-------------------------|------|-----------------------------------------------------------------------|-------------------|----------------------|-----------------------|------------------|---------------------------------------------------------------------------------------------------------------------------------------------------------|
| Chen, Chuang, Lin, Lin                | Using colloidal lithography to fabricate and optimize sub-wavelength pyramidal and honeycomb structures in solar cells | Si                      | 2007 | Pyramids                                                              | 350, 200          | 350, 200             | 480, 360              | 250–850          | 500 nm height much better than 300 nm in simulation, experimental results showed fabrication of pyramidal structures with less than 1.5% reflectivity   |
| Ting, Chang, Chen, Chou               | Fabrication of an AR polymer optical film with SWS using a roll-to-roll micro-replication process                      | PET, $n = 1.54$         | 2008 | Conical cylinder array                                                | 400               | 200                  | 350                   | 400–700 nm       | AR < 2.45% in 400–700 nm range for experimental results, similar to theoretical predictions, simulated $R$ is 1.87%                                     |
| Ting, Chen, Chou                      | SWS for broadband AR application                                                                                       | PMMA, $n = 1.54$        | 2009 | Cones                                                                 | 350               | 350                  | 300                   | 400–700 nm       | Ni molded lithography fabrication of conical structures in plastics. Simulation and experimental reflectances are 0.5% and 0.54% between 400 and 650 nm |
| Deniz, Khudiyev, Buyukserin, Bayindir | Room temperature large-area nanoimprinting for broadband biomimetic AR surfaces                                        | Hydrogen silsesquioxane | 2011 | Hexagonal nanorods, tapered nanorods, thin films with nanorods on top | 130               | 80                   | 200–400               | 400–800          | Optimum nanorod height was 175 nm                                                                                                                       |

Table S3. Cont.

|                                      |                                                                                                                                 |                                      |      |                                                   |         |                              |                                                                    |                                  |                                                                                                                                                                                                                                                                                               |
|--------------------------------------|---------------------------------------------------------------------------------------------------------------------------------|--------------------------------------|------|---------------------------------------------------|---------|------------------------------|--------------------------------------------------------------------|----------------------------------|-----------------------------------------------------------------------------------------------------------------------------------------------------------------------------------------------------------------------------------------------------------------------------------------------|
| Park, Shin, Kang, Baek, Kim, Padilla | Broadband Optical Antireflection Enhancement by Integrating Antireflective Nanoislands with Silicon Nanoconical-Frustrum Arrays | Polystyrene nanoislands and Si cones | 2011 | Si substrate and cones with PS nanoislands on top | 500 nm  | Cone 300 nm top, 500 nm base | Nanoislands 0, 50, 100 nm thick on top of cone, cone height 500 nm | Broadband, 300–900 nm            | Determined best size for cones and islands and fabricated, 50 nm thick island was best                                                                                                                                                                                                        |
| Yi, Lee, Park                        | Site-specific design of cone-shaped Si NWs by exploiting nanoscale surface diffusion for optimal photoabsorption                | Si                                   | 2011 | Conical (5° angle) and cylindrical nanowires      | 1500 nm | 200 and 1000 for cylinders   | 1500 nm                                                            |                                  | Good agreement with experimental, sim results for substrate and nanocone array were 44% and 2.7%, nanocones absorbed over 96% of visible range, cylinders were 22% <i>R</i> for 200 nm wide and 29% <i>R</i> for 1000 nm wide, cylinders had 49%–64% optical absorption, not as good as cones |
| Son, Verma, Danner, Bhatia, Yang     | Enhancement of optical transmission with random nanohole structures                                                             | $n = 1.5$                            | 2011 | V-shaped nanoholes                                | 100 nm  | 60 nm                        | 300 nm                                                             | 400–1200 nm, 0 to 70 degrees AOI | solar cell efficiency increased from 10.47% to 11.2%                                                                                                                                                                                                                                          |
